# Supplementary material
Source: publisher site journal article supplement (http://kjim.org/upload/media/kjim-2021-410-suppl8.pdf)
Supplement: Supplementary file 1 [file kjim-2021-410-suppl8.pdf]

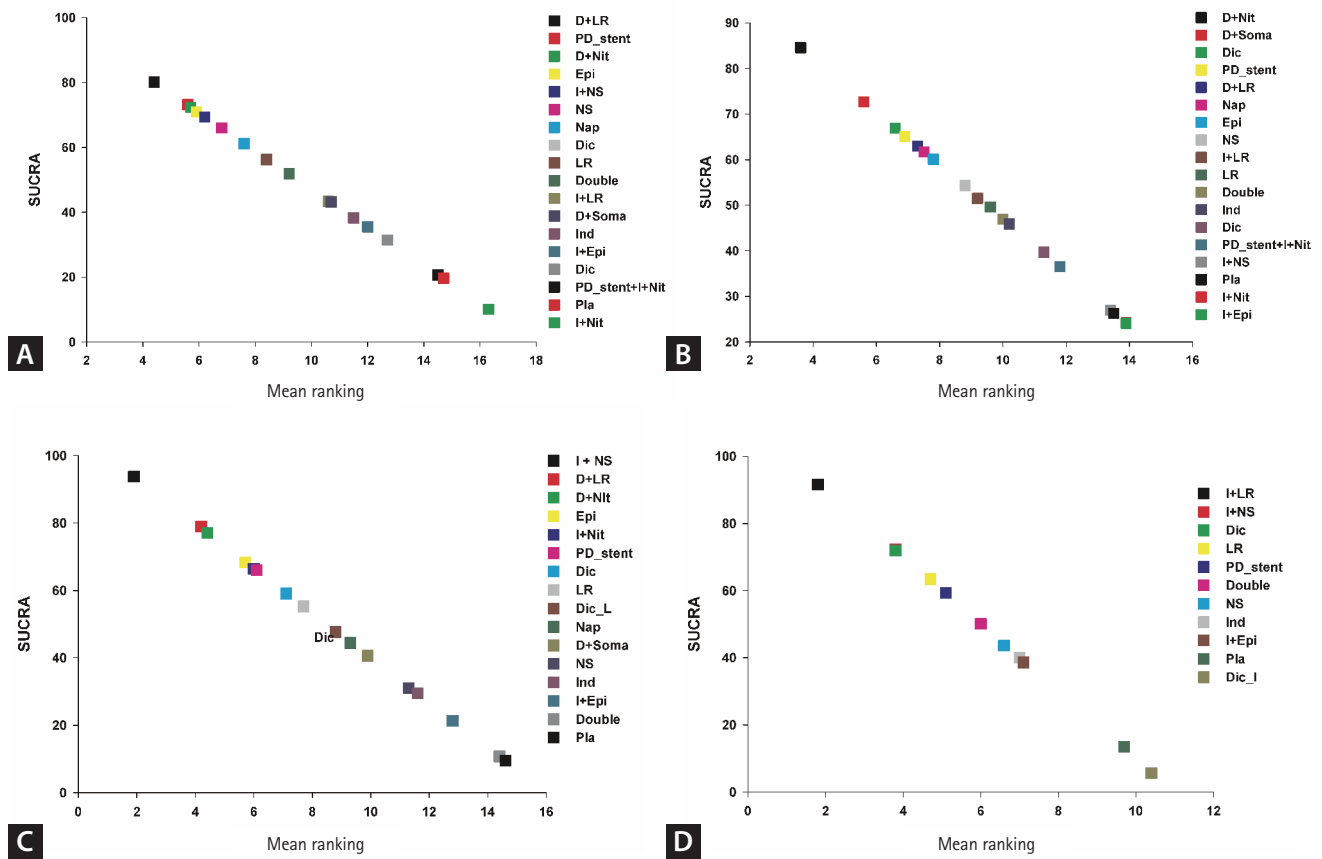

**Supplementary Figure 6.** Expected mean ranking and surface of under cumulative ranking curve (SUCRA) values. X-axis corresponds to expected mean ranking based on SUCRA value, and y-axis corresponds to SUCRA value. (A) Mild post-endoscopic retrograde cholangiopancreatography (ERCP) pancreatitis (PEP), (B) moderate-to-severe PEP, (C) average-risk group, (D) high-risk group. D or Dic, diclofenac; Dic\_L, diclofenac low dose; Double, double dose of indomethacin; Epi, epinephrine; I or Ind, indomethacin; LR, lactated Ringer’s solution; Nap, naproxen; Nit, nitrate; NS, normal saline; PD, pancreatic duct; Pla, placebo; soma, somatostatin.
